# Supplementary material
Source: Springer Nature journal article supplement (https://www.springermedizin.de/resource/supplementary/12971_2014_178_MOESM1_ESM.pdf/9595132)

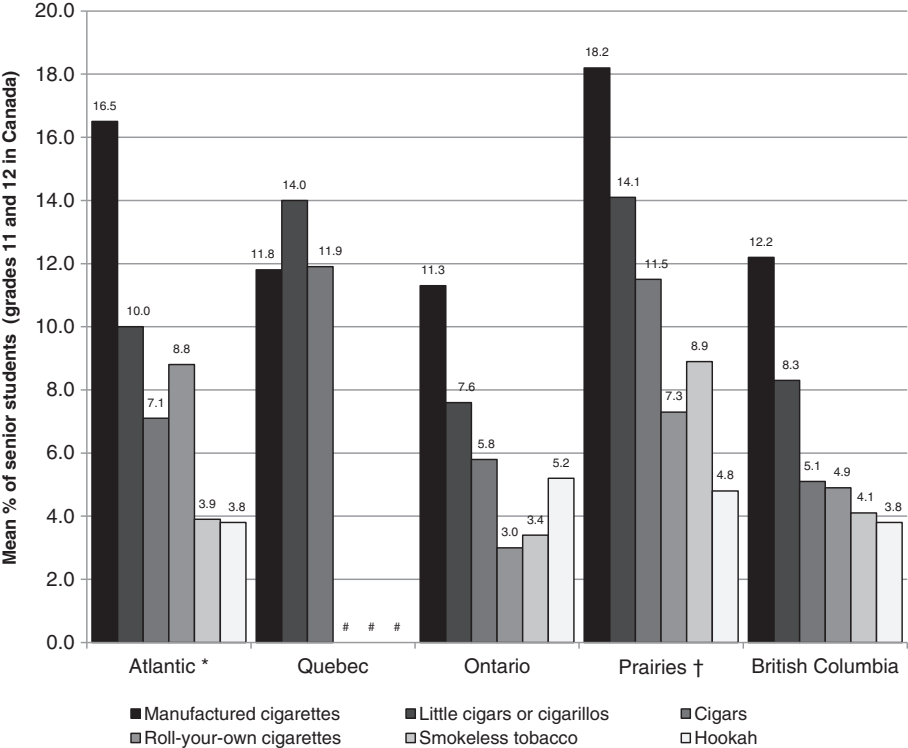

Supplement: MOESM1 [file 9595132]
